# Supplementary material for: Multicenter Evaluation of Label-Free Quantification in Human Plasma: Benchmarking with a High Dynamic Range Multispecies Sample Set
Source: Research Square preprint supplement (doi:10.21203/rs.3.rs-5618718/v1), 2024-12-18
Supplement: Supplementary file 3 [file 222064982404adf1bbdcc14f.xlsx]

## Sheet: Legend
Supplementary Table 6. Summary of different metrics for yeast proteins identified in the DIA dataset in sample sets PYE1, PYE3 and PYE9, such as protein ID number, precision and accuracy values, number of datapoints at FWHM as reported in DIA-NN (DP_FWHM), etc. Calculated log2(FC) values (median value of the distribution) between samples A and B are listed in the present table along with the glob…

## Sheet: Yeast_proteins_DIA_statistics
Organism	Accuracy	Precision	Lab.Setup	PYE	Dilution	Gradient.Length	median_CV_A	median_CV_B	mean_CV_AB	Peak.Capacity	DP_FWHM	Counts
Yeast	0.34	0.28	A_evo_ex	A_evo_ex_PYE1	PYE1	44	1.92	1.64	1.78	92.58	2.2	1520
Yeast	0.23	0.25	A_evo_ex	A_evo_ex_PYE3	PYE3	44	1.9	2.36	2.13	92.46	2.2	909
Yeast	0.1	0.29	A_evo_ex	A_evo_ex_PYE9	PYE9	44	2.15	1.81	1.98	90.93	2.2	445
Yeast	0.17	0.18	A_ulti_ex	A_ulti_ex_PYE1	PYE1	50	2.64	2.57	2.6	185.81	1.67	1784
Yeast	0.21	0.22	A_ulti_ex	A_ulti_ex_PYE3	PYE3	50	2.81	3.08	2.95	191.5	1.67	1044
Yeast	0.02	0.21	A_ulti_ex	A_ulti_ex_PYE9	PYE9	50	2.81	3.05	2.93	140.45	1.67	482
Yeast	-0.09	0.26	B_ulti_HF	B_ulti_HF_PYE1	PYE1	90	2.46	2.62	2.54	74.91	3.18	764
Yeast	-0.11	0.26	B_ulti_HF	B_ulti_HF_PYE3	PYE3	90	3.23	3.86	3.55	73.18	3.18	379
Yeast	-0.29	0.31	B_ulti_HF	B_ulti_HF_PYE9	PYE9	90	2.33	3.9	3.115	72.63	3.18	99
Yeast	0.11	0.19	B_ulti_HFX	B_ulti_HFX_PYE1	PYE1	90	2.11	2.11	2.11	112.02	2.31	1000
Yeast	0	0.23	B_ulti_HFX	B_ulti_HFX_PYE3	PYE3	90	2.21	3.35	2.78	109.33	2.31	495
Yeast	-0.18	0.28	B_ulti_HFX	B_ulti_HFX_PYE9	PYE9	90	1.92	1.91	1.915	110.92	2.31	188
Yeast	0.37	0.22	C_nE_tTOF	C_nE_tTOF_PYE1	PYE1	70	4.15	4.62	4.39	136.01	3.57	1588
Yeast	0.51	0.27	C_nE_tTOF	C_nE_tTOF_PYE3	PYE3	70	4.32	4.07	4.2	148.28	3.57	901
Yeast	0.19	0.21	C_nE_tTOF	C_nE_tTOF_PYE9	PYE9	70	5.09	4.97	5.03	122.99	3.57	414
Yeast	0.12	0.2	D_ulti_ecl	D_ulti_ecl_PYE1	PYE1	60	2.79	2.81	2.8	84.94	2.44	1357
Yeast	0.05	0.2	D_ulti_ecl	D_ulti_ecl_PYE3	PYE3	60	3.26	3.33	3.3	84.89	2.42	745
Yeast	-0.14	0.27	D_ulti_ecl	D_ulti_ecl_PYE9	PYE9	60	3.75	3.88	3.815	83.16	2.37	336
Yeast	-0.07	0.27	D_Vanq_ex	D_Vanq_ex_PYE1	PYE1	60	1.8	1.83	1.82	144.15	3.12	849
Yeast	-0.2	0.32	D_Vanq_ex	D_Vanq_ex_PYE3	PYE3	60	2.09	2.16	2.13	145.72	3.12	411
Yeast	-0.27	0.31	D_Vanq_ex	D_Vanq_ex_PYE9	PYE9	60	1.23	1.38	1.305	151.89	3.12	174
Yeast	0.06	0.23	E_ulti_lumos	E_ulti_lumos_PYE1	PYE1	60	1.83	1.78	1.8	110.18	2.13	1512
Yeast	0	0.23	E_ulti_lumos	E_ulti_lumos_PYE3	PYE3	60	2.07	2.19	2.13	111.09	2.13	841
Yeast	0	0.22	E_ulti_lumos	E_ulti_lumos_PYE9	PYE9	60	1.92	1.96	1.94	89.16	2.13	451
Yeast	-0.04	0.23	E_Vanq_ex	E_Vanq_ex_PYE1	PYE1	60	1.5	1.63	1.57	244.28	3.08	765
Yeast	-0.17	0.29	E_Vanq_ex	E_Vanq_ex_PYE3	PYE3	60	1.83	1.79	1.81	233.42	3.08	358
Yeast	-0.27	0.3	E_Vanq_ex	E_Vanq_ex_PYE9	PYE9	60	1.1	1.15	1.125	230.14	3.08	134
Yeast	0.42	0.22	G_nLC_tTOF	G_nLC_tTOF_PYE1	PYE1	30	4.62	4.39	4.51	105.45	2.09	2388
Yeast	0.36	0.26	G_nLC_tTOF	G_nLC_tTOF_PYE3	PYE3	30	4.55	5.07	4.81	97.71	2.09	1570
Yeast	0.29	0.24	G_nLC_tTOF	G_nLC_tTOF_PYE9	PYE9	30	5.12	5.45	5.285	87.37	2.09	818
Yeast	0.32	0.23	G_ulti_ex	G_ulti_ex_PYE1	PYE1	48	1.46	1.27	1.37	109.67	2.37	1850
Yeast	0.33	0.3	G_ulti_ex	G_ulti_ex_PYE3	PYE3	48	1.62	1.52	1.57	111.75	2.37	1132
Yeast	0.17	0.26	G_ulti_ex	G_ulti_ex_PYE9	PYE9	48	1.79	1.62	1.705	108.47	2.37	626
Yeast	0.18	0.2	H_ulti_ecl	H_ulti_ecl_PYE1	PYE1	120	2.22	2.82	2.52	164.95	2.5	2060
Yeast	0.04	0.22	H_ulti_ecl	H_ulti_ecl_PYE3	PYE3	120	3.09	3.1	3.1	157.05	2.45	1166
Yeast	-0.01	0.25	H_ulti_ecl	H_ulti_ecl_PYE9	PYE9	120	3.31	4.16	3.735	143.16	2.45	617
Yeast	0.13	0.15	H_ulti_ex	H_ulti_ex_PYE1	PYE1	102	1.81	1.6	1.71	107.4	2.13	2243
Yeast	0.14	0.16	H_ulti_ex	H_ulti_ex_PYE3	PYE3	102	1.99	2.04	2.02	131.78	2.12	1376
Yeast	0.11	0.21	H_ulti_ex	H_ulti_ex_PYE9	PYE9	102	2.62	3.02	2.82	133.35	2.14	727
Yeast	0.34	0.22	I_nLC_ex	I_nLC_ex_PYE1	PYE1	44	3.61	3.66	3.63	37.26	1.41	1883
Yeast	0.27	0.23	I_nLC_ex	I_nLC_ex_PYE3	PYE3	44	3.94	4.05	4	38.07	1.41	1104
Yeast	0.23	0.29	I_nLC_ex	I_nLC_ex_PYE9	PYE9	44	4.44	4.48	4.46	48.36	1.41	615
Yeast	0.23	0.22	J_nLC_tTOF	J_nLC_tTOF_PYE1	PYE1	44	3.94	3.71	3.82	64.56	1.71	1209
Yeast	0.25	0.25	J_nLC_tTOF	J_nLC_tTOF_PYE3	PYE3	44	3.87	4.28	4.08	93.68	1.71	723
Yeast	0.25	0.3	J_nLC_tTOF	J_nLC_tTOF_PYE9	PYE9	44	4.15	4.1	4.125	91.95	1.71	383
Yeast	0.28	0.21	K_Mclass_zTOF	K_Mclass_zTOF_PYE1	PYE1	20	2.7	2.52	2.61	95.12	2.37	1810
Yeast	0.24	0.22	K_Mclass_zTOF	K_Mclass_zTOF_PYE3	PYE3	20	2.98	2.98	2.98	99.05	2.32	1075
Yeast	0.2	0.26	K_Mclass_zTOF	K_Mclass_zTOF_PYE9	PYE9	20	3.32	3.36	3.34	95.99	2.34	584
Yeast	0.09	0.23	L_nAcqu_tTOF	L_nAcqu_tTOF_PYE1	PYE1	11	3.8	4.36	4.08	81.74	2.74	358
Yeast	0.07	0.21	L_nAcqu_tTOF	L_nAcqu_tTOF_PYE3	PYE3	11	2.87	2.34	2.61	83.41	2.75	141
Yeast	0.18	0.28	L_nAcqu_tTOF	L_nAcqu_tTOF_PYE9	PYE9	11	2.06	1.93	1.995	83.72	2.86	42
Yeast	0.31	0.21	L_nE_tTOF	L_nE_tTOF_PYE1	PYE1	35.5	3.15	3.01	3.08	171.62	2.15	1252
Yeast	0.35	0.25	L_nE_tTOF	L_nE_tTOF_PYE3	PYE3	35.5	3.31	2.83	3.07	172.46	2.16	679
Yeast	0.27	0.23	L_nE_tTOF	L_nE_tTOF_PYE9	PYE9	35.5	3.54	3.17	3.355	164.48	2.16	345
Yeast	-0.01	0.3	L_ulti_ex	L_ulti_ex_PYE1	PYE1	29	1.88	2.01	1.95	124.3	3.11	370
Yeast	0.13	0.3	L_ulti_ex	L_ulti_ex_PYE3	PYE3	29	1.5	1.33	1.42	126.02	2.65	130
Yeast	0.33	0.36	L_ulti_ex	L_ulti_ex_PYE9	PYE9	29	1.04	1.26	1.15	129.36	3.05	41
Yeast	0.1	0.25	L_ulti_ex_FAIMS	L_ulti_ex_FAIMS_PYE1	PYE1	29	2.94	2.67	2.81	133.1	3.21	620
Yeast	-0.24	0.43	L_ulti_ex_FAIMS	L_ulti_ex_FAIMS_PYE3	PYE3	29	4.76	4.59	4.68	127.46	3.22	220
Yeast	-0.02	0.34	L_ulti_ex_FAIMS	L_ulti_ex_FAIMS_PYE9	PYE9	29	2.93	2.7	2.815	131.12	3.31	145
