# Supplementary material for: Multicenter Evaluation of Label-Free Quantification in Human Plasma: Benchmarking with a High Dynamic Range Multispecies Sample Set
Source: Research Square preprint supplement (doi:10.21203/rs.3.rs-5618718/v1), 2024-12-18
Supplement: Supplementary file 4 [file 6613d9bcb03918d0a19b1c7a.xlsx]

## Sheet: Legend
Supplementary Table 2. Number of identified peptides and proteins for each experimental LC-MS setup in PYE1.

## Sheet: DDA_ID
Lab_Setup	Gradient Length [min]	No. of proteins identified in all runs	Total no. of identified proteins	Protein ID count_per_GL	Identified across all runs [%]	No. of peptides identified in all runs	Total no. of identified peptides	Peptide ID count_per_GL	Peptides identified across all runs [%]
A_evo_ex	44	1025	1539	34.9773	66.6017	8824	15259	346.795	57.8282		avg no. of proteins	1743.21
A_ulti_ex	50	1222	2381	47.62	51.323	9815	18207	364.14	53.9078		avg no. of peptides	15835.3
B_ulti_HF	90	521	919	10.2111	56.6921	4588	8142	90.4667	56.3498
B_ulti_HFX	90	870	1564	17.3778	55.6266	7030	14130	157	49.7523
C_nE_tTOF	70	610	1719	24.5571	35.4857	4358	16403	234.329	26.5683
D_ulti_ecl	60	523	1342	22.3667	38.9717	4543	12283	204.717	36.9861
D_Vanq_ex	60	849	1446	24.1	58.7137	7465	14208	236.8	52.5408
E_ulti_lumos	60	677	1439	23.9833	47.0466	5613	12830	213.833	43.749
E_Vanq_ex	60	926	1516	25.2667	61.0818	8080	14570	242.833	55.4564
F_Vanq_ecl	60	885	1923	32.05	46.0218	7226	17538	292.3	41.202
G_nLC_tTOF	30	1314	2759	91.9667	47.626	7363	22872	762.4	32.1922
G_ulti_ex	48	878	1907	39.7292	46.0409	7544	18298	381.208	41.2285
H_ulti_ecl	120	928	1570	13.0833	59.1083	7582	14137	117.808	53.6323
H_ulti_ex	102	1222	2381	23.3431	51.323	10678	22817	223.696	46.7984

## Sheet: DIA_ID
Lab_Setup	Gradient Length [min]	No. of proteins identified in all runs	Total no. of identified proteins	Protein ID count_per_GL	Proteins identified across all runs [%]	No. of peptides identified in all runs	Total no. of identified peptides	Peptide ID count_per_GL	Peptides identified across all runs [%]
A_evo_ex	44	2882	3279	74.5227	87.8927	20220	30024	682.364	67.3461		avg no. of proteins	3192.6
A_ulti_ex	50	3403	4074	81.48	83.5297	21664	39134	782.68	55.3585		avg no. of peptides	29258.5
B_ulti_HF	90	1535	2219	24.6556	69.1753	9669	20169	224.1	47.9399
B_ulti_HFX	90	2066	2668	29.6444	77.4363	14098	24550	272.778	57.4257
C_nE_tTOF	70	2817	3349	47.8429	84.1147	15222	28651	409.3	53.129
D_ulti_ecl	60	2666	3338	55.6333	79.8682	16500	28716	478.6	57.4593
D_Vanq_ex	60	1791	2494	41.5667	71.8123	12723	23890	398.167	53.2566
E_ulti_lumos	60	2909	3709	61.8167	78.4308	19422	34058	567.633	57.0262
E_Vanq_ex	60	1687	2305	38.4167	73.1887	11952	21260	354.333	56.2183
G_nLC_tTOF	30	4070	4512	150.4	90.2039	26061	42377	1412.57	61.498
G_ulti_ex	48	3396	3760	78.3333	90.3191	25151	35960	749.167	69.9416
H_ulti_ecl	120	3748	4492	37.4333	83.4372	27141	45396	378.3	59.7872
H_ulti_ex	102	4153	4653	45.6176	89.2542	32459	47781	468.441	67.9329
I_nLC_ex	44	3268	4357	99.0227	75.0057	18378	45909	1043.39	40.0314
J_nLC_tTOF	44	2895	3245	73.75	89.2142	18256	27659	628.614	66.0038
K_Mclass_zTOF	20	3255	3594	179.7	90.5676	22417	35043	1752.15	63.97
L_nAcqu_tTOF	11	1353	1433	130.273	94.4173	7813	10328	938.909	75.6487
L_nE_tTOF	35.5	2729	2861	80.5915	95.3862	18422	24121	679.465	76.3733
L_ulti_ex	29	1426	1514	52.2069	94.1876	7829	10029	345.828	78.0636
L_ulti_ex_FAIMS	29	1708	1996	68.8276	85.5711	6448	10116	348.828	63.7406
